# Supplementary material for: Thermal conversion of [Fe(phen)3](SCN)2 thin films into the spin crossover complex Fe(phen)2(NCS)2
Source: Royal Society of Chemistry journal article supplement (doi:10.1039/c3ra22534h), 2013-01-01
Supplement: c3ra22534h.pdf [file c3ra22534h.pdf]

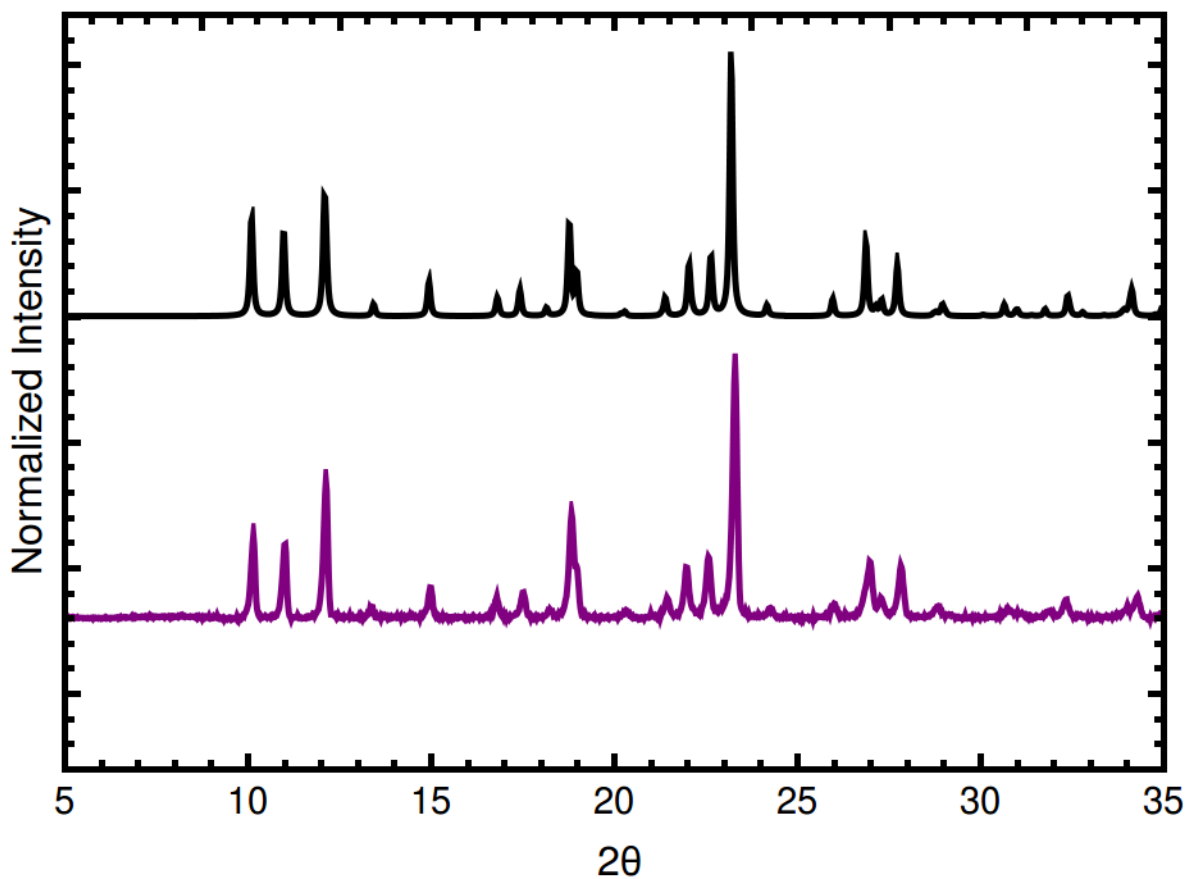

**Fig. S1** Powder XRD (Cu K $\alpha$ ) for Fe(phen)<sub>2</sub>(NCS)<sub>2</sub> powder. Top: Spectrum simulated using single crystal x-ray diffraction structure at 293 K from reference 34. Bottom: Synthesized.

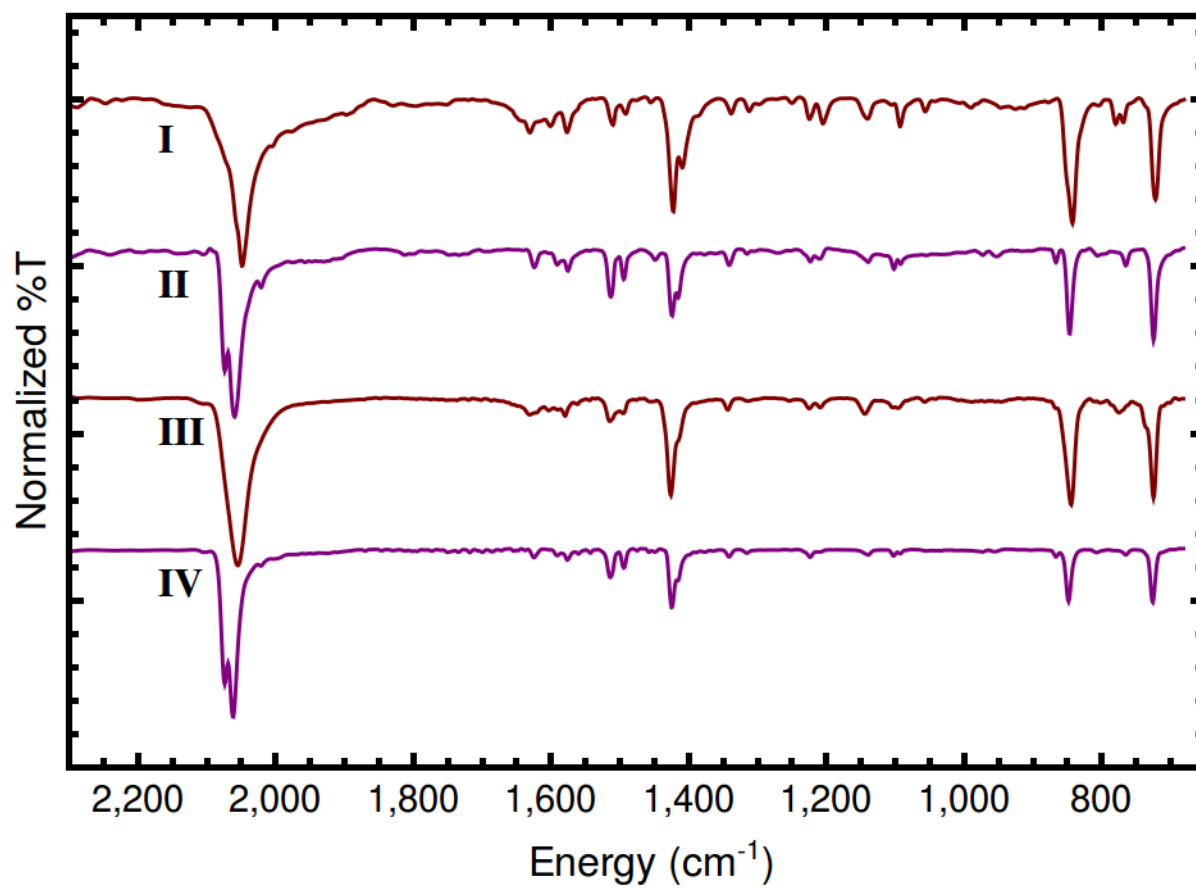

**Fig. S2** Full FT-IR spectra normalized to the N-CS stretch. Assignments are the same as those in Fig. 2.

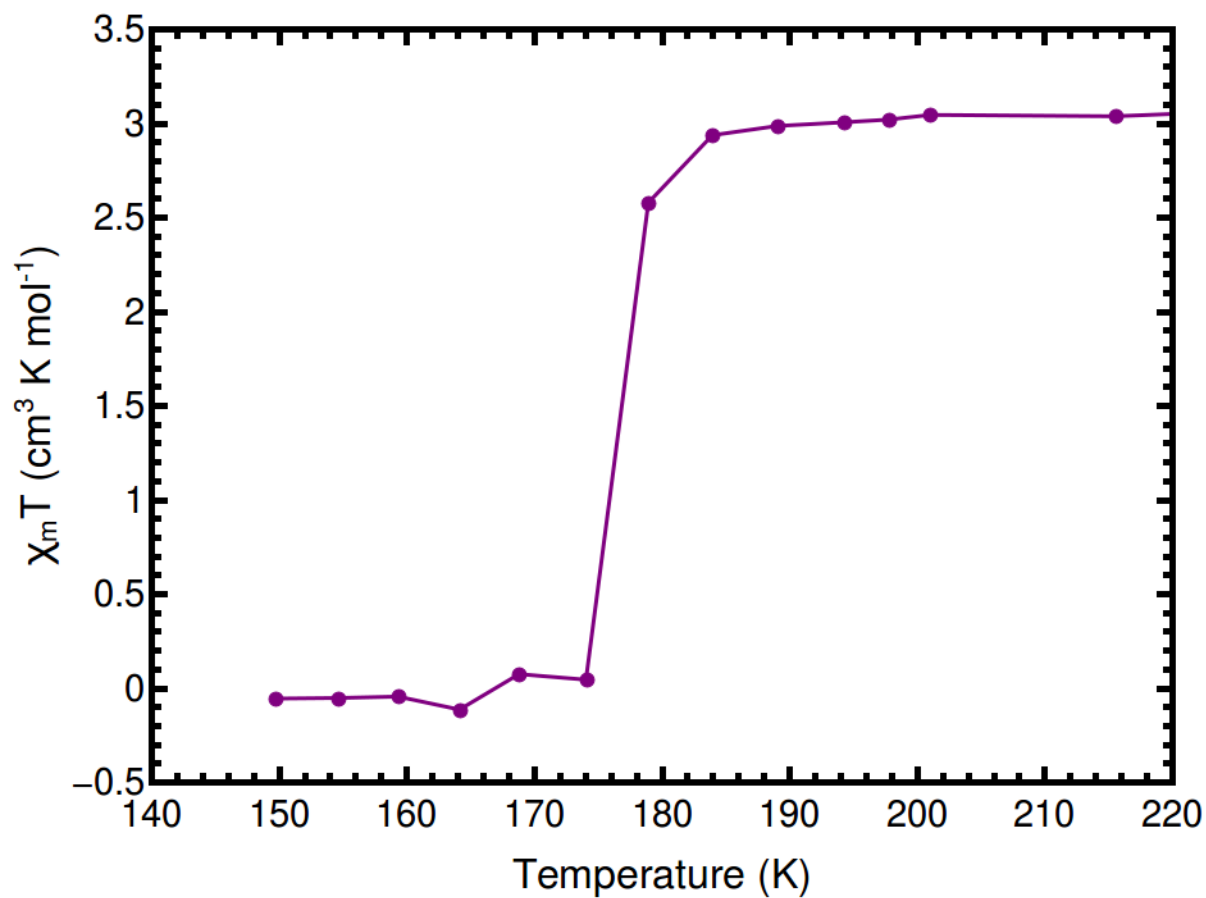

**Fig. S3** Spin-crossover of bulk  $\text{Fe}(\text{phen})_2(\text{NCS})_2$  powder observed by variation of ( $\chi_m T$ ) with temperature measured by SQUID magnetometry ( $H = 1 \text{ kOe}$ ) for approximately 10 mg.



|       |       |       |       |       |       |       |       |                               |
|-------|-------|-------|-------|-------|-------|-------|-------|-------------------------------|
| 990 w |       |       |       |       |       |       |       |                               |
| 982 w |       |       |       |       |       |       |       |                               |
|       |       | 972 w |       |       |       | 972 w |       |                               |
| 946 w |       | 952 w |       |       |       | 954 w |       |                               |
| 925 w |       |       |       |       |       |       |       |                               |
| 913 w | 912 m |       |       |       | 913 w |       |       |                               |
|       |       |       | 902 w |       |       |       | 905 w |                               |
| 877 w | 876 w |       |       |       | 878 w |       |       |                               |
|       |       | 865 m | 865 m | 865 w |       | 865 w | 865 m |                               |
| 842 s |       | 845 s |       | 843 s |       | 845 s |       | carbocyclic ring deformation  |
| 804 w |       | 804 w | 808 w | 809 w |       | 805 w | 808 w | v(NC-S)                       |
|       |       |       |       | 801 w |       |       |       |                               |
|       |       | 792 w |       |       |       |       |       | v(NC-S)                       |
| 779 m |       |       |       | 773 m |       |       |       |                               |
| 768 m |       | 764 m |       |       |       | 763 w |       |                               |
| 736 w | 737 s |       |       | 734 w | 738 s |       |       |                               |
| 722 s | 723 m | 723 s | 725 s | 724 s | 724 m | 724 s | 725 s | heterocyclic ring deformation |
|       | 645 w |       |       |       |       | 645 w |       |                               |
|       |       |       | 636 w |       |       |       | 636 w |                               |
|       |       |       |       |       |       | 619 w |       |                               |
|       |       |       |       |       |       | 583 w |       |                               |
|       | 560 m |       |       |       |       | 561 m | 559 w |                               |
|       | 495 m |       |       |       |       | 495 w |       | δ(NCS)                        |
|       | 464 w |       |       |       |       |       |       |                               |
|       | 435 w |       |       |       |       | 436 w |       |                               |
|       | 419 w |       | 419 m |       |       |       | 419 m |                               |
|       | 407 w |       | 406 w |       |       |       | 406 w |                               |
|       | 368 w |       |       |       |       | 369 w |       | v(Fe-N(phen))                 |
|       | 314 w |       |       |       |       | 314 w |       |                               |
|       | 296 w |       |       |       |       | 296 w |       |                               |
|       | 281 w |       | 282 m |       |       |       | 282 s |                               |
|       |       |       | 257 w |       |       |       | 258 w | v(Fe-NCS)                     |
|       |       |       | 217 m |       |       |       | 218 m | v(Fe-N(phen))                 |
|       | 177 w |       | 177 s |       |       |       | 179 s |                               |
|       | 154 w |       | 155 w |       | 153 m |       | 154 w |                               |
|       |       |       | 131 w |       |       |       | 132 m |                               |

<sup>a</sup> A red film vapor deposited onto KBr. <sup>b</sup> A red film vapor deposited onto glass. <sup>c</sup> A purple film on KBr made by annealing a red film. <sup>d</sup> A purple film on glass made by annealing a red film. <sup>e</sup> Assignments drawn from references 29, 39, 64.
